# Supplementary material
Source: PubMed Central journal article supplement (PMC2423157)
Supplement: supp_28_10_3513__1.pdf [file supp_28_10_3513__1.pdf]

## Supplementary Materials

**Supplementary Table 1.** References of alternative exons that were collected from the literature (the last four are diseases caused by exonization of *Alu*).

| Numbers as in Fig 1A | Gene name       | Reference |
|----------------------|-----------------|-----------|
| 22                   | Integrin b1     | (8)       |
| 23                   | CHRNA3          | (4)       |
| 24                   | AcCHR           | (5)       |
| 34                   | HPK1            | (3)       |
| 35                   | Dnmt1           | (2)       |
| 36                   | TGM4            | (1)       |
| 48                   | GYRATE (OAT)    | (6)       |
| 49                   | COL4A3 (Alport) | (7)       |
| 50                   | GUSB (SLY)      | (10)      |
| not shown*           | CCFDN           | (9)       |

\* Alternative exonization derived from *Alu* left arm.

### Reporting Exons Sequences

The ADAR2 wt exon (the exonizing sequence is in capitalized letters, while the flanking intronic splice sites is in lower case):

```
ttttttttttttttttgagacagGGTCTCGCTCTTACACCCAGGCTGGAGTGCAGT  
GGTGCAATCATGGCTCACTGCAGCCTCGACCTCCTGGGCTCTTAAG  
CGATCCTTCCACCTCAACCTTCCAAGGAGCTGGGACTACAGgcatgtac
```

The PGT intronic *Alu*

ttttttttttttttttgagACGGAGTTTCACCCTTGTTGCCAGGCTGGAGTGCA  
ATGGCACGAtCTCAGCTAACTGAAACCTCCGCCTCCCAGgttcaagcgatt  
ctcctgcctcagcctcctagcagctaggattacaagcatgcgccaccacaccagctgattttgattttt

#### The IKAP intronic *Alu*

ttttctttgtttttttttgagacagAGTCTTGCTCTGTCACCCAGGCTGGAGTACAG  
TGGCGCAATCTCGGCTTACTGCAACCTCTGCCTTCTGGGTTCAAGC  
AATCCTCCCCTTCAGCCTCCCGCATAACTAGGATTACAGgtgtgcacc  
acgcctggctaattt

#### References

1. Dubbink, H. J., L. de Waal, R. van Haperen, N. S. Verkaik, J. Trapman, and J. C. Romijn. 1998. The human prostate-specific transglutaminase gene (TGM4): genomic organization, tissue-specific expression, and promoter characterization. *Genomics* 51:434-44.
2. Hsu, D. W., M. J. Lin, T. L. Lee, S. C. Wen, X. Chen, and C. K. Shen. 1999. Two major forms of DNA (cytosine-5) methyltransferase in human somatic tissues. *Proc Natl Acad Sci U S A* 96:9751-6.
3. Hu, M. C., W. R. Qiu, X. Wang, C. F. Meyer, and T. H. Tan. 1996. Human HPK1, a novel human hematopoietic progenitor kinase that activates the JNK/SAPK kinase cascade. *Genes Dev* 10:2251-64.
4. Mihovilovic, M., Y. Mai, M. Herbstreith, F. Rubboli, P. Tarroni, F. Clementi, and A. D. Roses. 1993. Splicing of an anti-sense *Alu* sequence generates a coding sequence variant for the alpha-3 subunit of a neuronal acetylcholine receptor. *Biochem Biophys Res Commun* 197:137-44.
5. Miller, M., and K. Zeller. 1997. Alternative splicing in lecithin:cholesterol acyltransferase mRNA: an evolutionary paradigm in humans and great apes. *Gene* 190:309-13.
6. Mitchell, G. A., D. Labuda, G. Fontaine, J. M. Saudubray, J. P. Bonnefont, S. Lyonnet, L. C. Brody, G. Steel, C. Obie, and D. Valle. 1991. Splice-mediated insertion of an *Alu* sequence inactivates ornithine delta-aminotransferase: a role for *Alu* elements in human mutation. *Proc Natl Acad Sci U S A* 88:815-9.
7. Netzer, K. O., O. Pullig, U. Frei, J. Zhou, K. Tryggvason, and M. Weber. 1993. COL4A5 splice site mutation and alpha 5(IV) collagen mRNA in Alport syndrome. *Kidney Int* 43:486-92.
8. Svineng, G., R. Fassler, and S. Johansson. 1998. Identification of beta1C-2, a novel variant of the integrin beta1 subunit generated by utilization of an alternative splice acceptor site in exon C. *Biochem J* 330 ( Pt 3):1255-63.
9. Varon, R., R. Gooding, C. Steglich, L. Marns, H. Tang, D. Angelicheva, K. K. Yong, P. Ambrugger, A. Reinhold, B. Morar, F. Baas, M. Kwa, I. Tournev, V. Guerguelcheva, I. Kremensky, H. Lochmuller, A. Mullner-Eidenbock, L. Merlini, L. Neumann, J. Burger, M. Walter, K.

Swoboda, P. K. Thomas, A. von Moers, N. Risch, and L. Kalaydjieva. 2003. Partial deficiency of the C-terminal-domain phosphatase of RNA polymerase II is associated with congenital cataracts facial dysmorphism neuropathy syndrome. *Nat Genet* 35:185-9.

10. Yamada, S., S. Tomatsu, W. S. Sly, R. Islam, D. A. Wenger, S. Fukuda, K. Sukegawa, and T. Orii. 1995. Four novel mutations in mucopolysaccharidosis type VII including a unique base substitution in exon 10 of the beta-glucuronidase gene that creates a novel 5'-splice site. *Hum Mol Genet* 4:651-5.
